# Supplementary material for: Power allocation and transmitter switching for broadcasting with multiple energy harvesting transmitters
Source: Springer Nature journal article supplement (doi:10.1186/1687-1499-2014-188), 2014-11-12

case 1

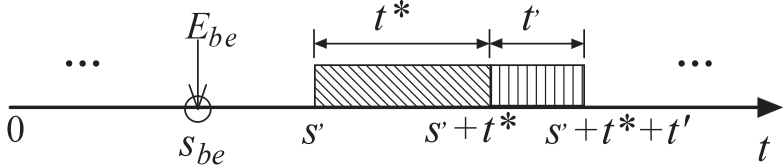

case 2

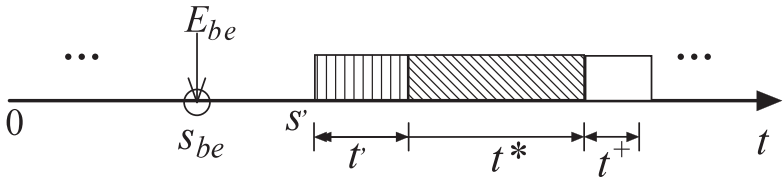

Supplement: 13638_2014_1005_MOESM6_ESM.pdf [file 13638_2014_1005_MOESM6_ESM.pdf]
